# Supplementary material
Source: MDPI journal article supplement (https://www.mdpi.com/2073-4352/7/7/199)
Supplement: s1 [file s1]

Supplementary Materials

Lanthanide Coordination Polymers as Luminescent Sensors for the Selective and Recyclable Detection of Acetone

Kaimin Wang, Yulu Ma and Huaijun Tang *


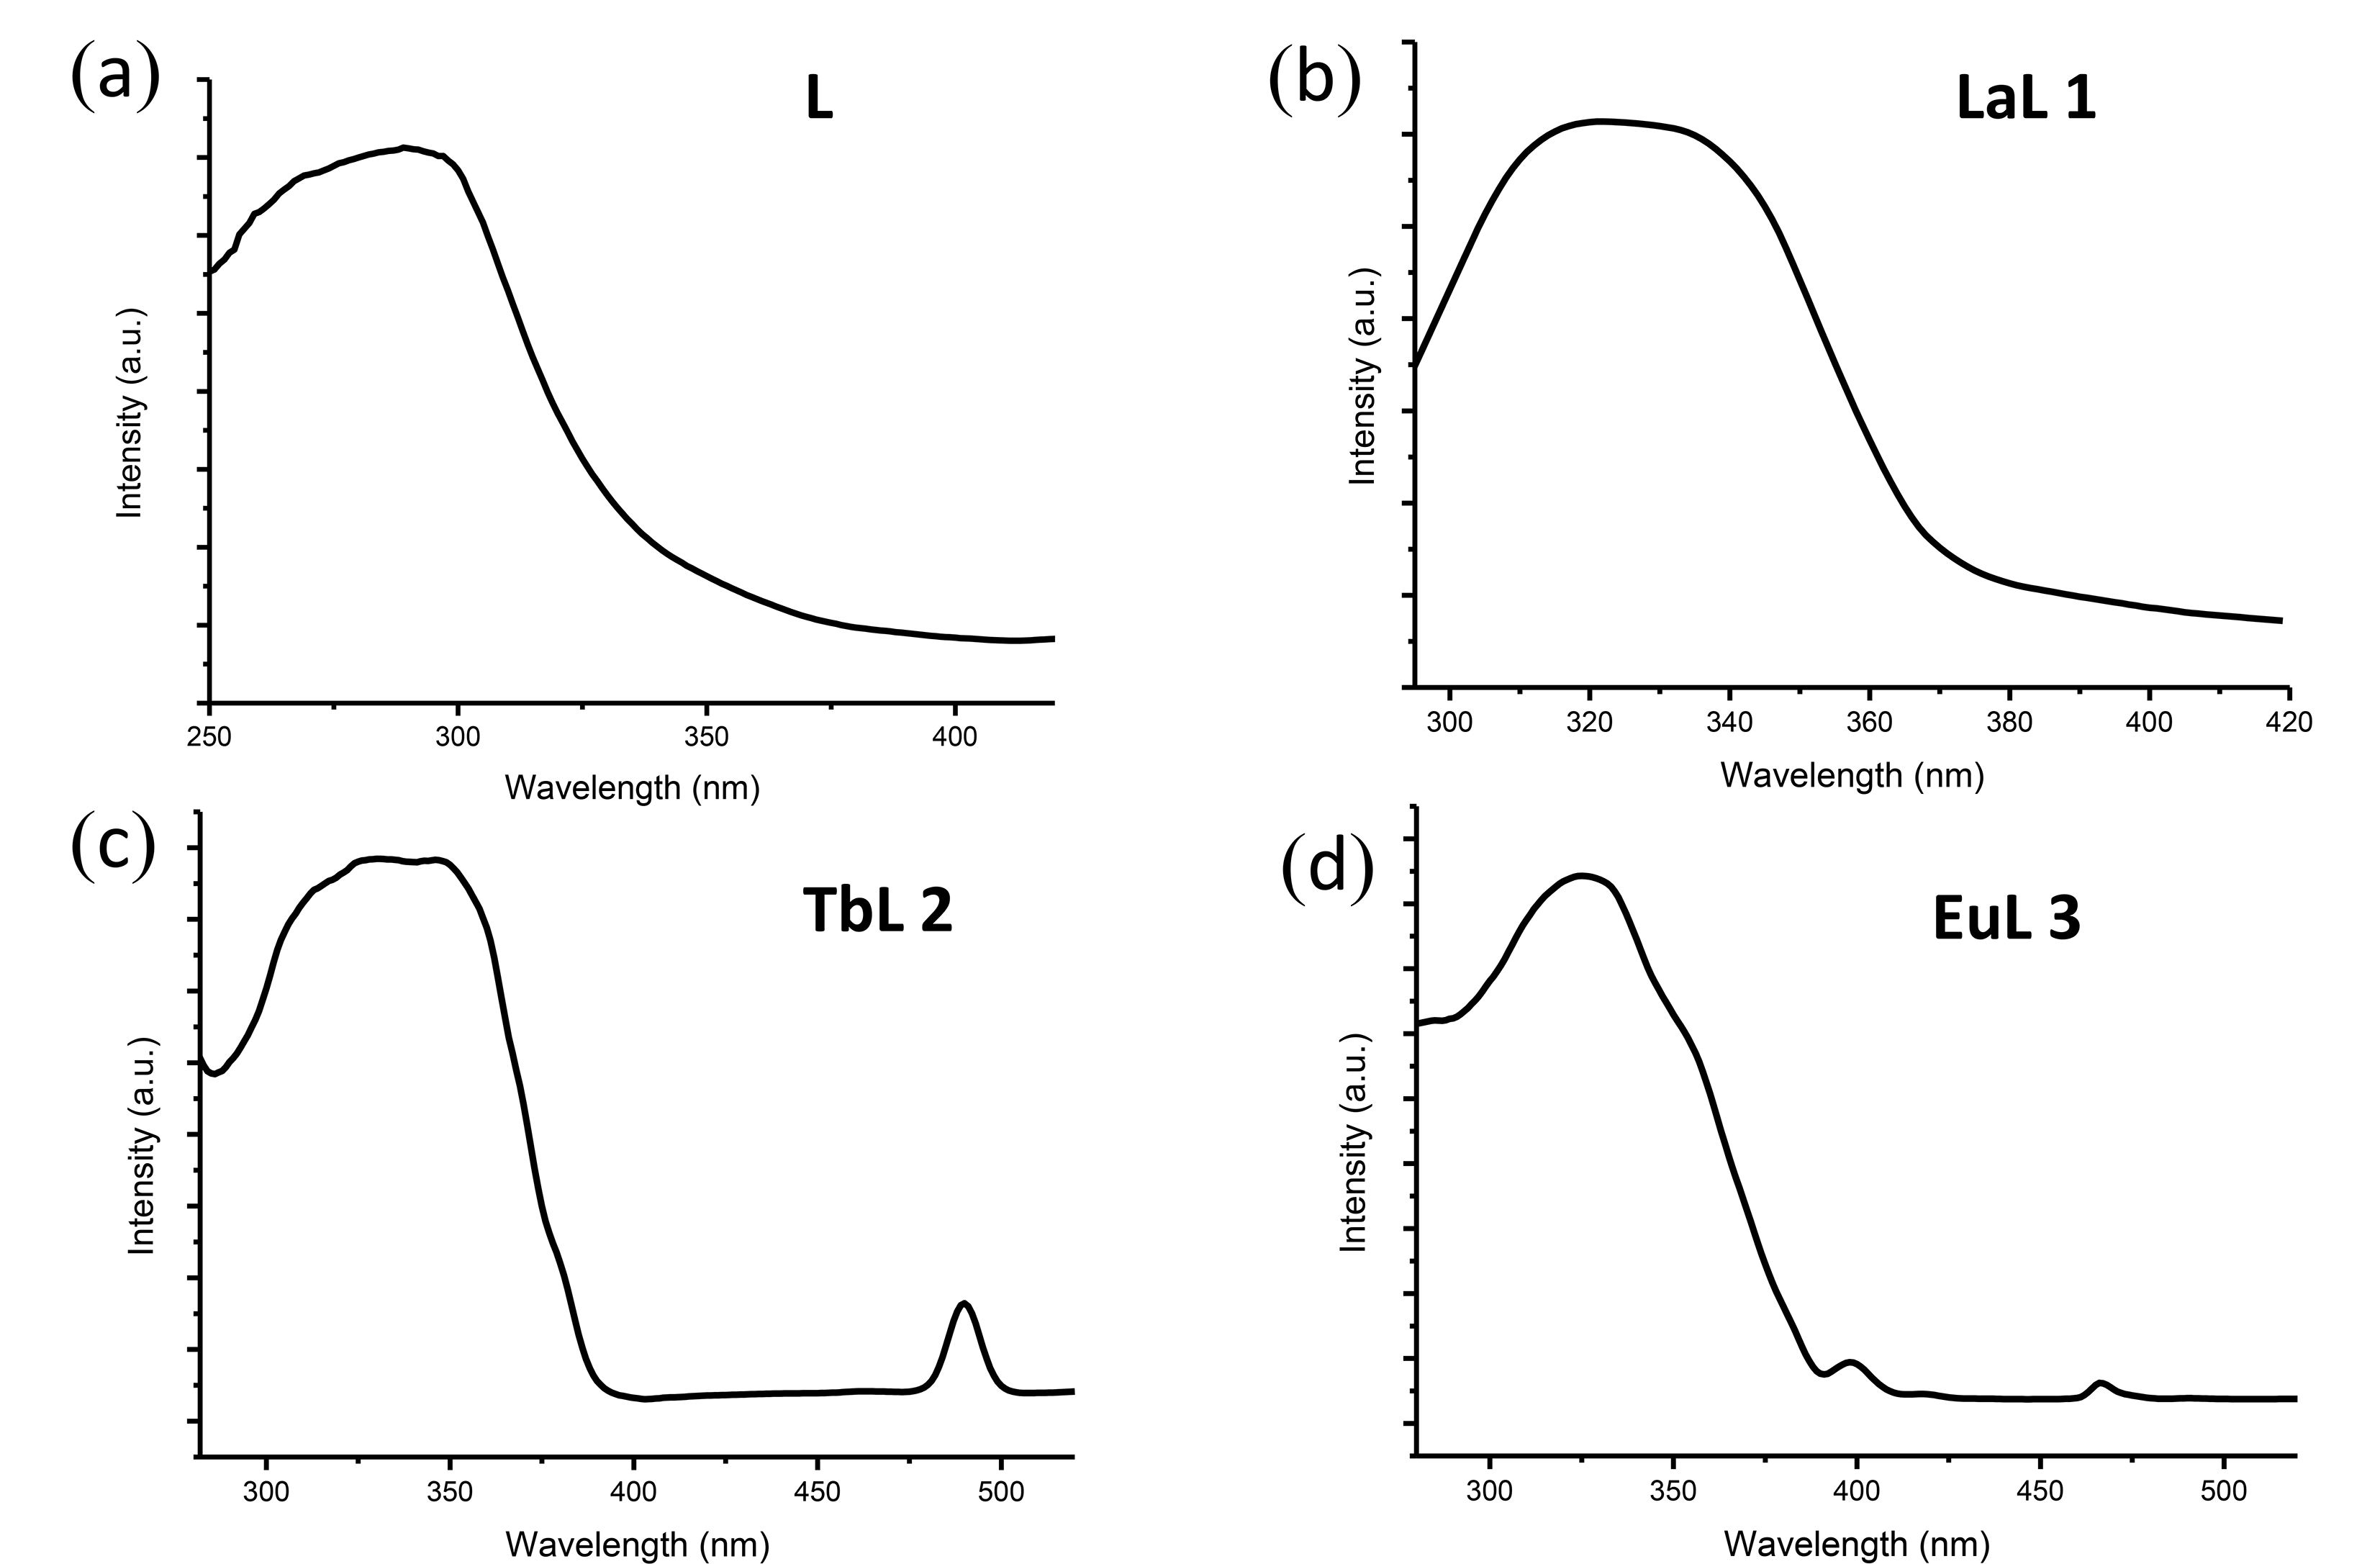


**Figure S1.** The solid-state excitation spectra of (**a**) the H2LCl ligand with *λ*em= 470 nm, (**b**) **LaL 1**,with *λ*em= 409 nm, (**c**) **TbL 2** with *λ*em= 544 nm, (**d**) **EuL 3** with *λ*em= 613 nm.


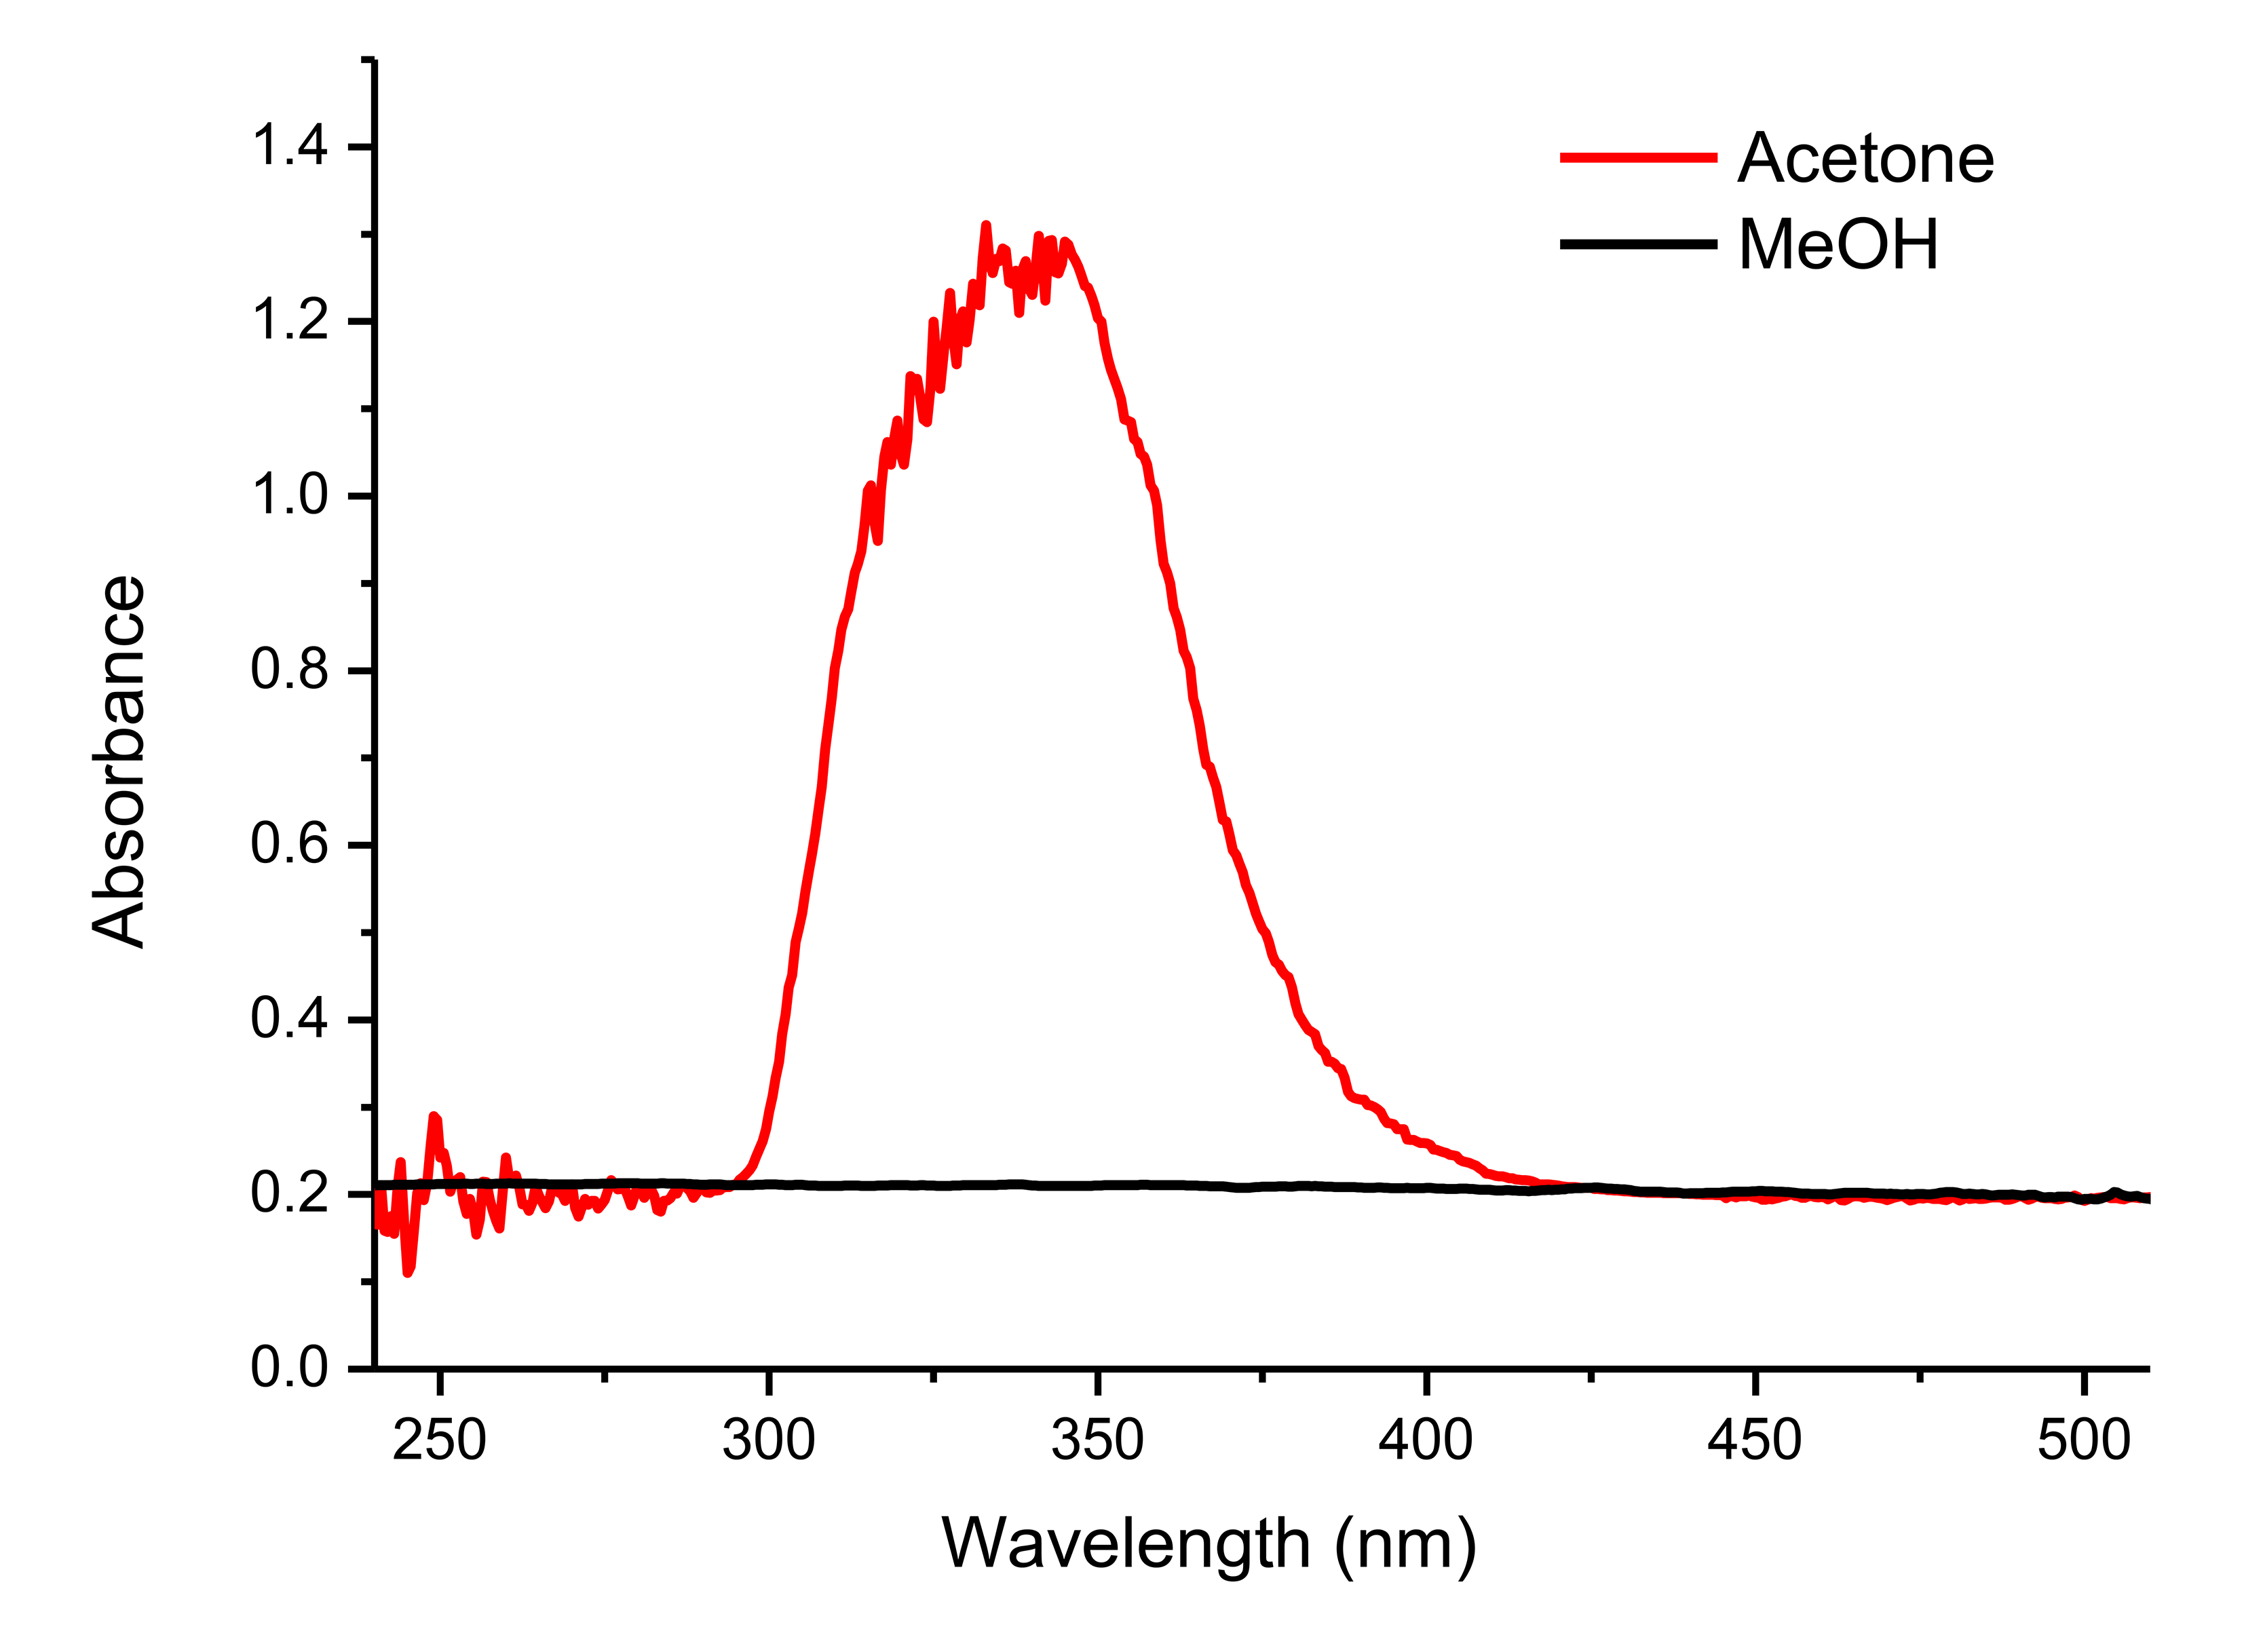


**Figure S2.** The UV/vis absorption spectra for acetone and methanol.


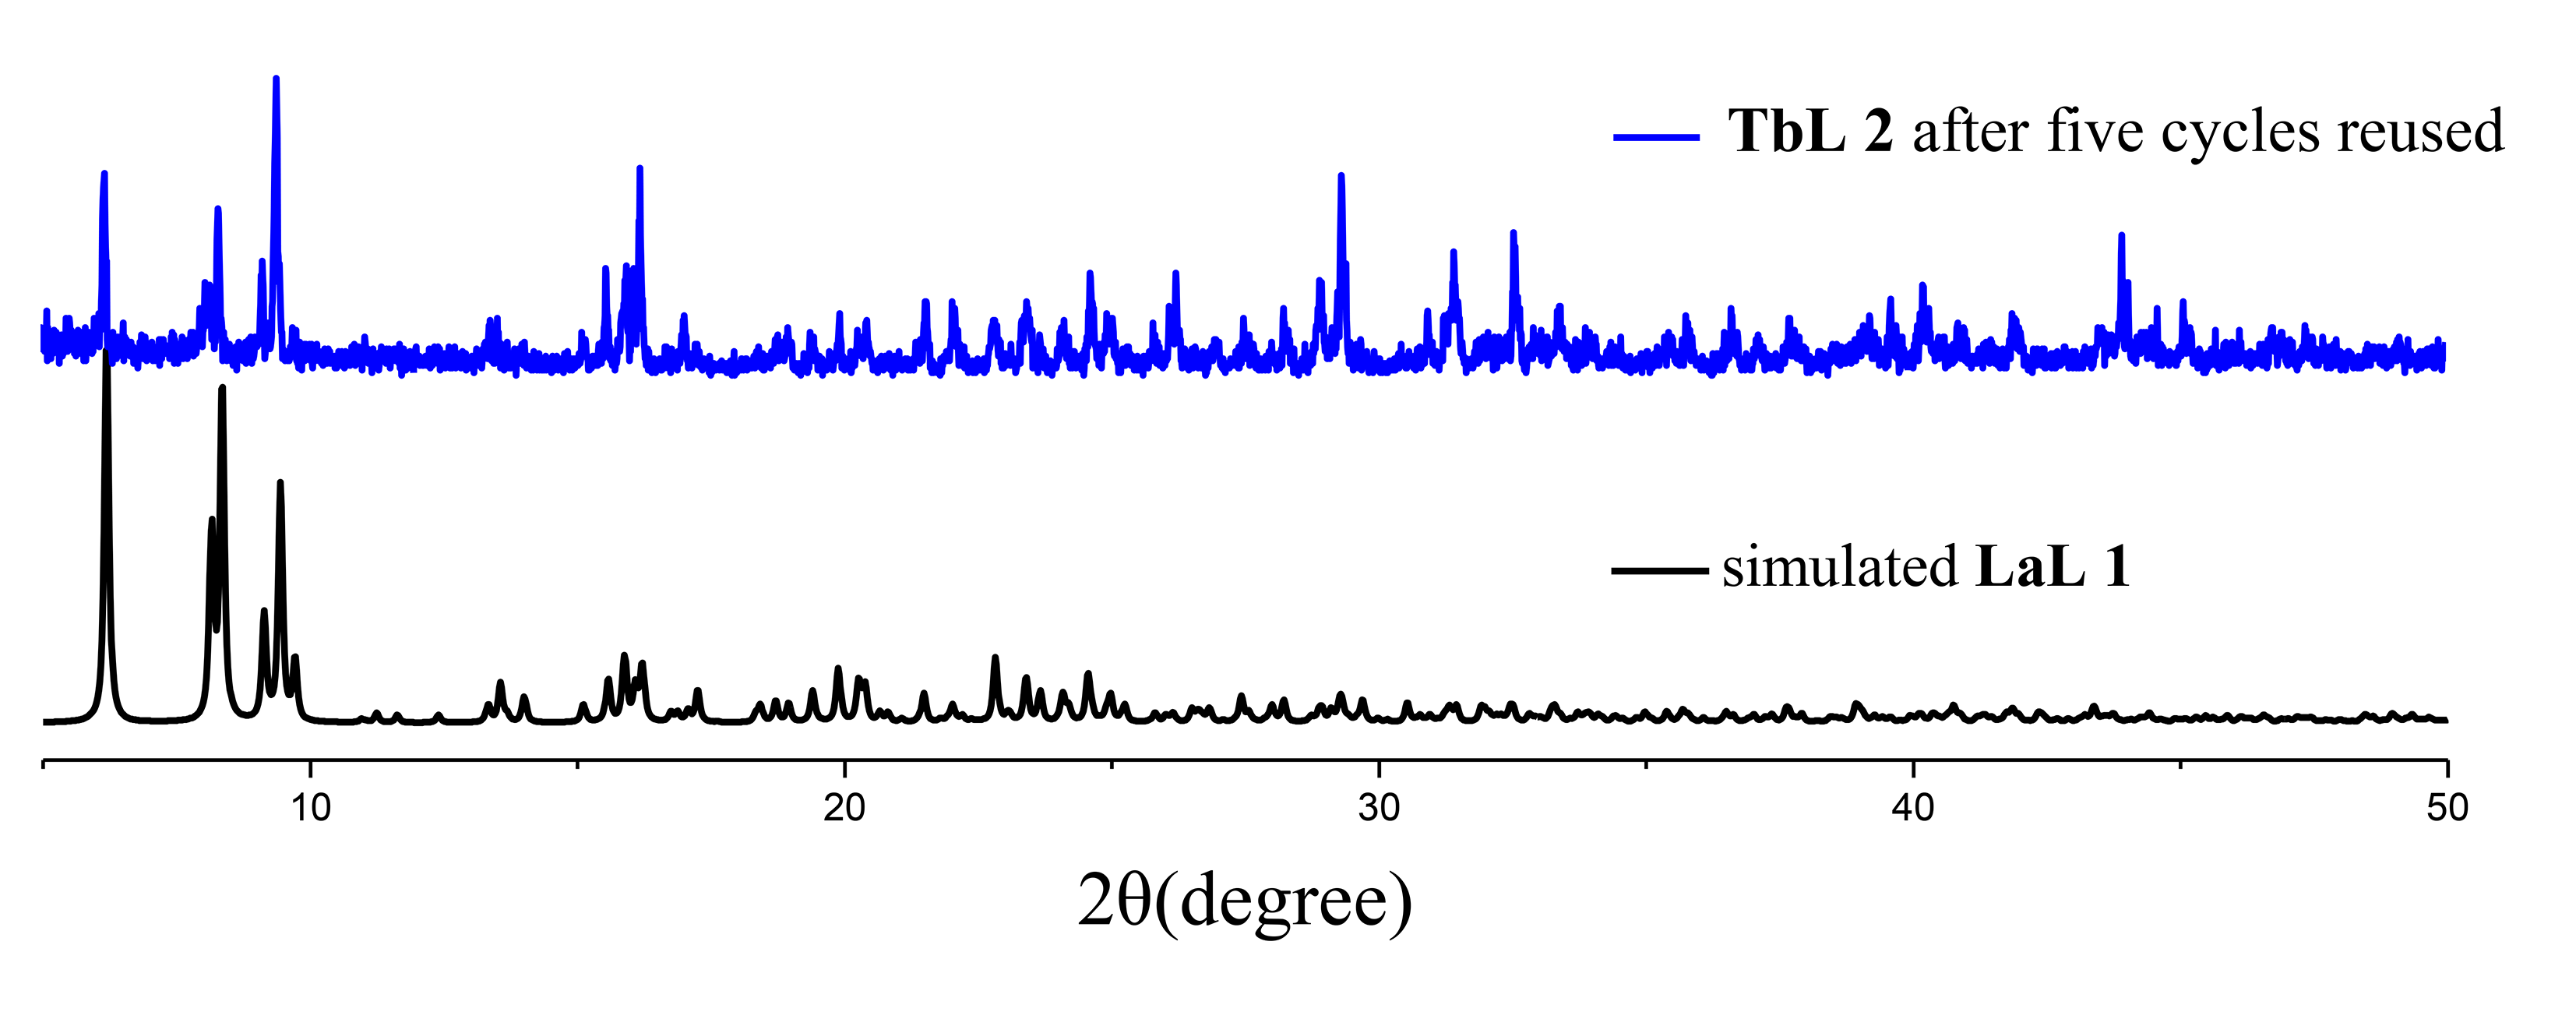


**Figure S3.** PXRD patterns of **TbL 1** after detection of acetone (after five cycles reused).

**
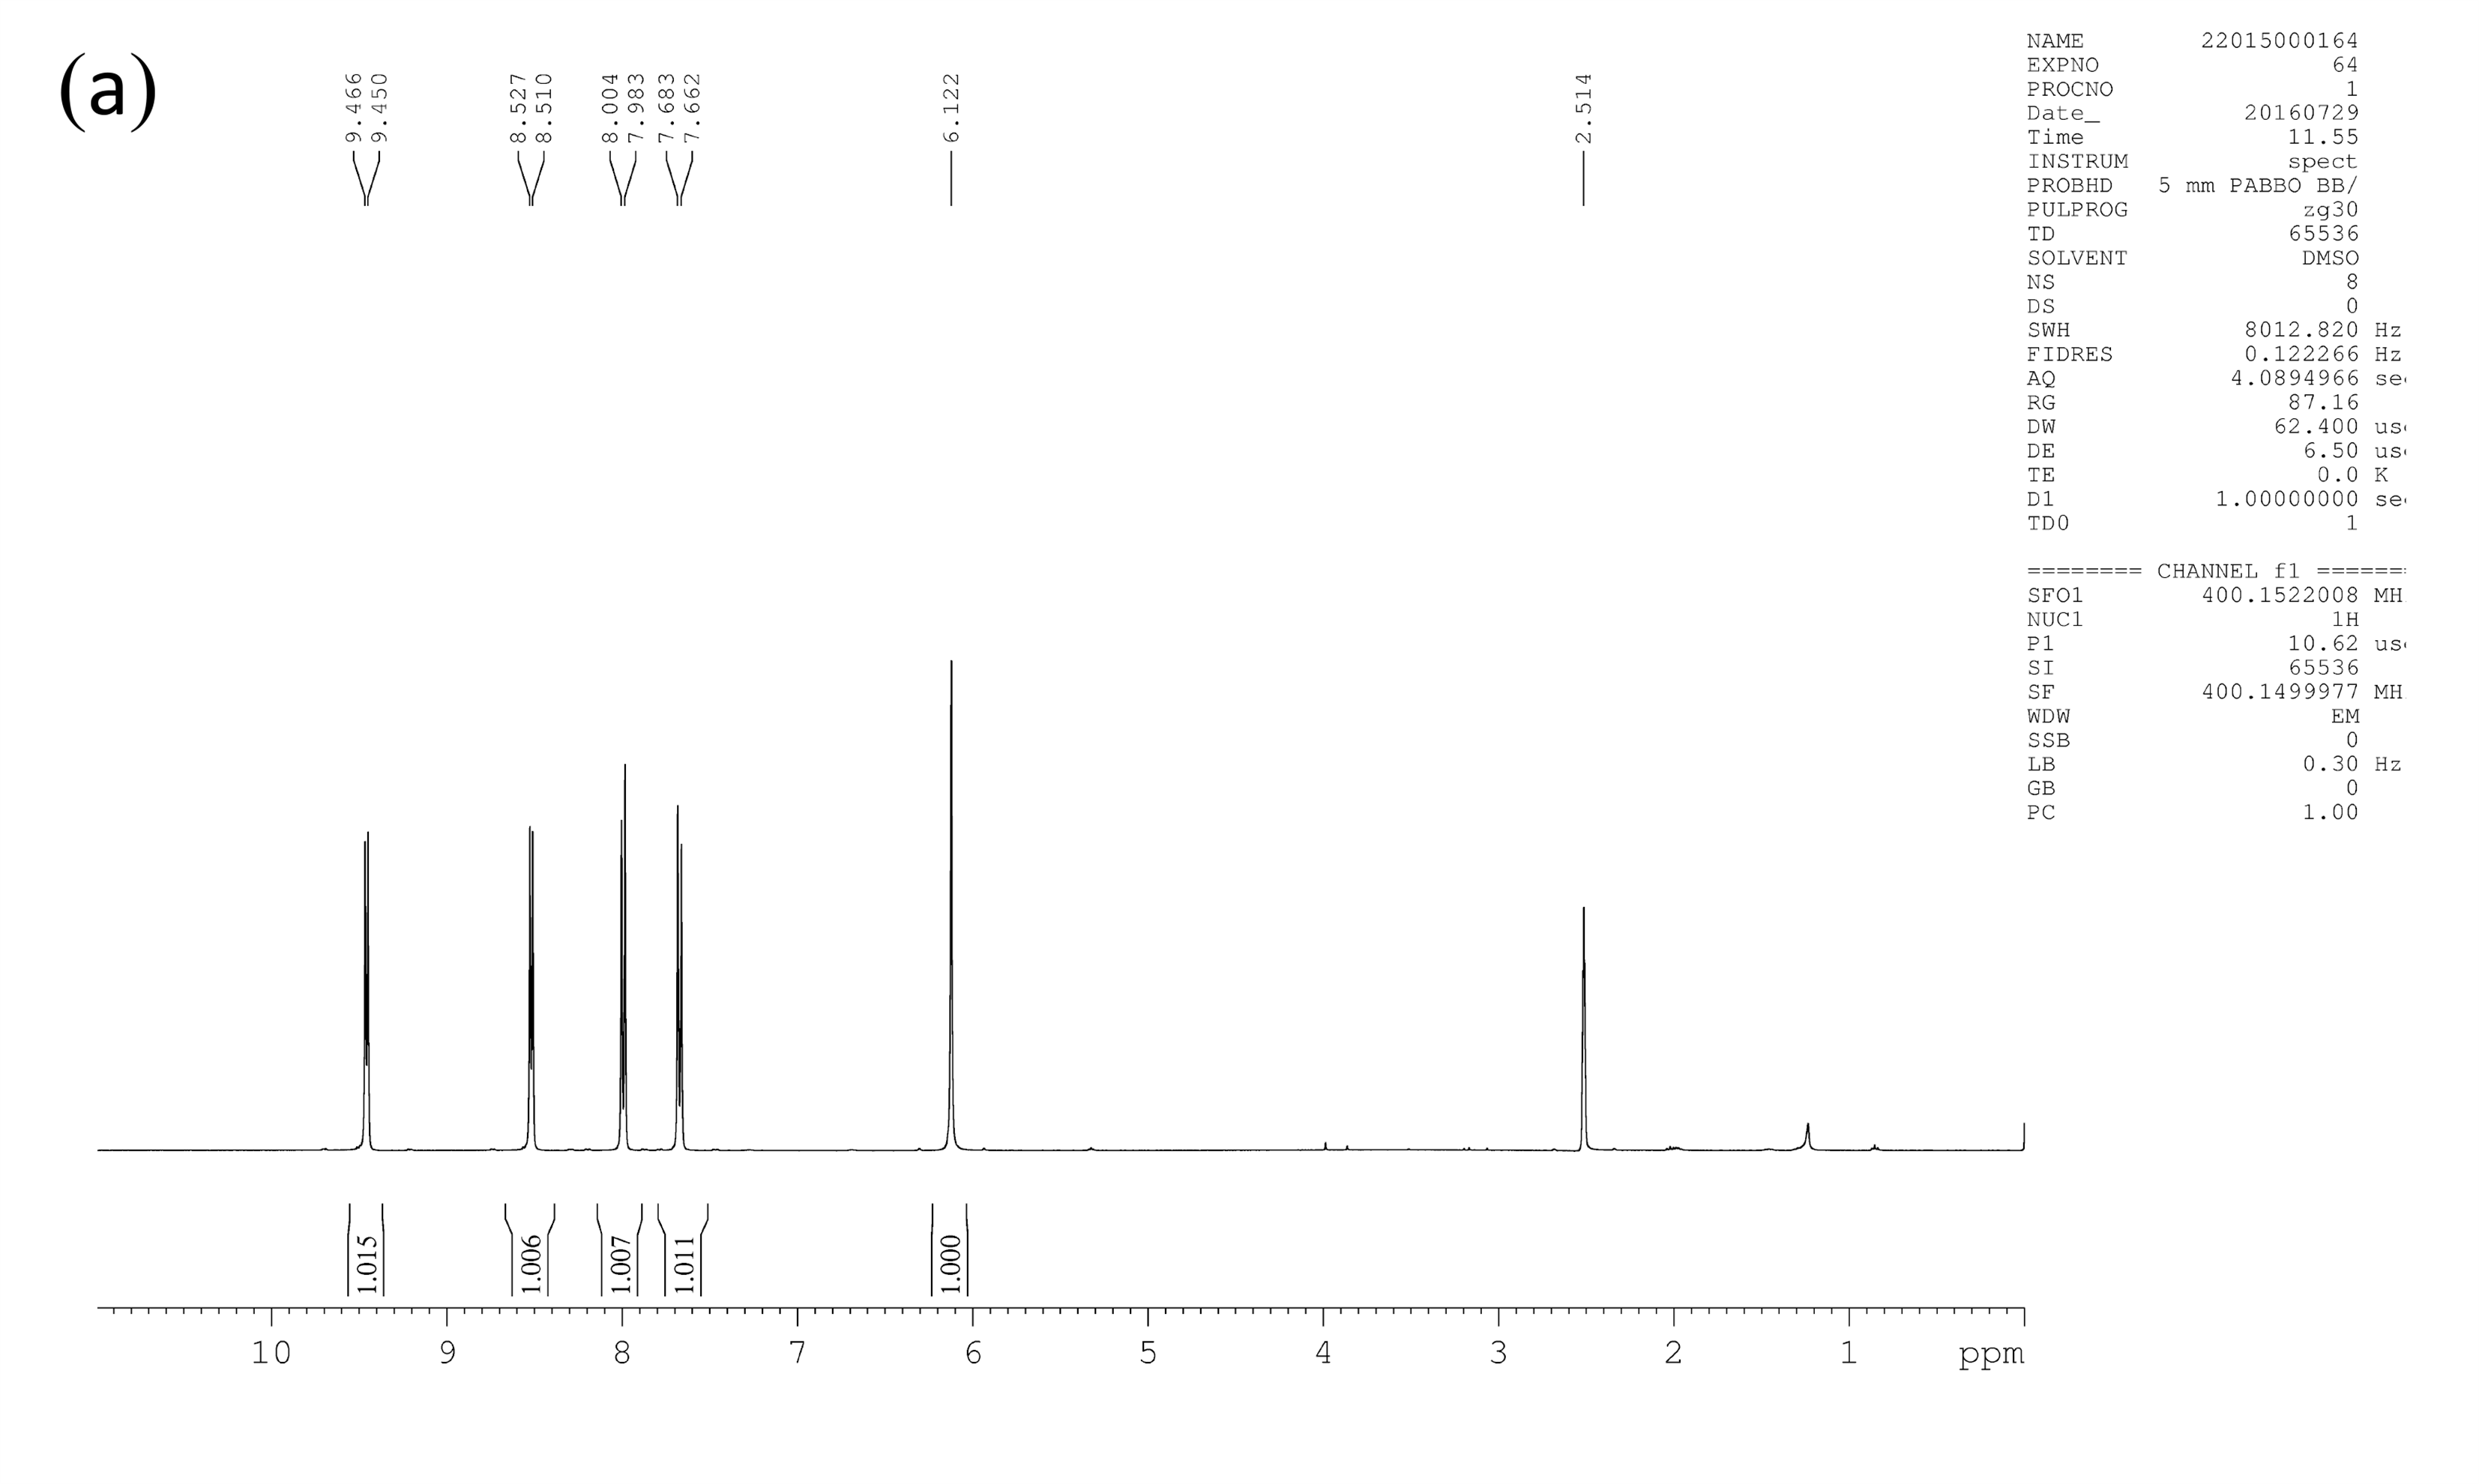
**

**
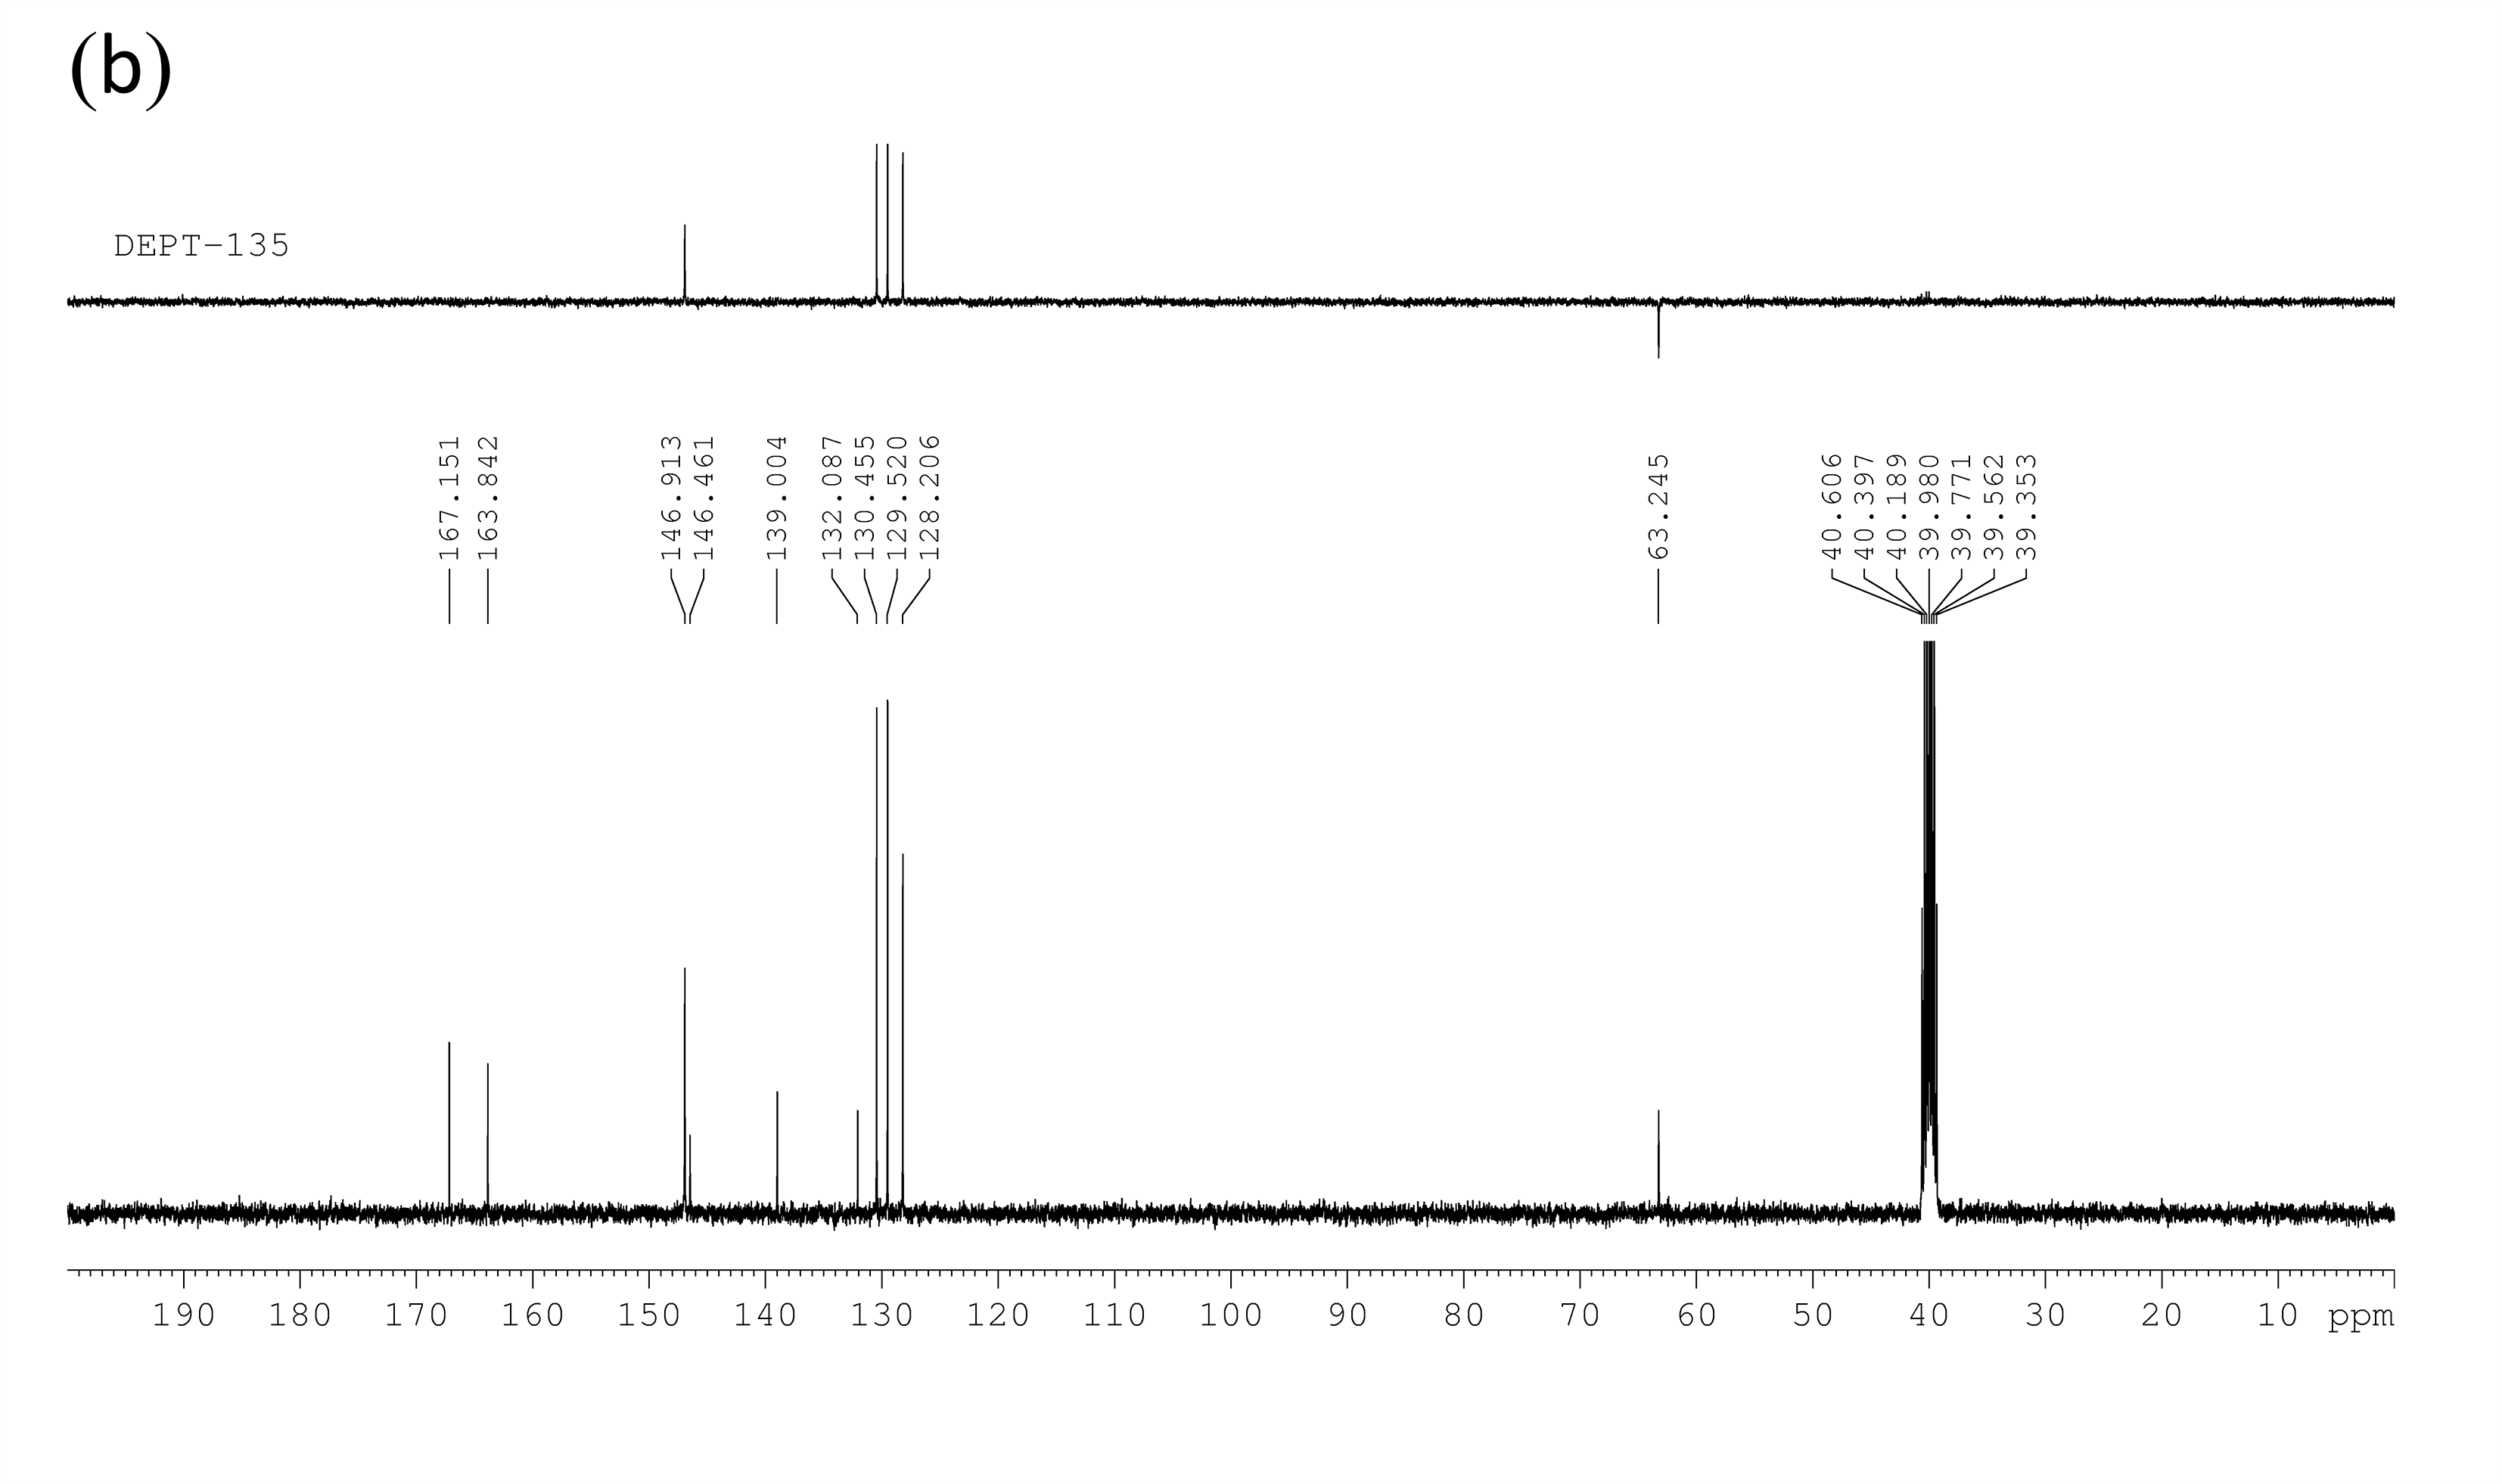
**

**Figure S4.** (**a**) 1H NMR (400 Hz, DMSO-*d*6) spectra of the H2LCl ligand; (**b**) 13C NMR (100 Hz, DMSO-*d*6) spectra of the H2LCl ligand.


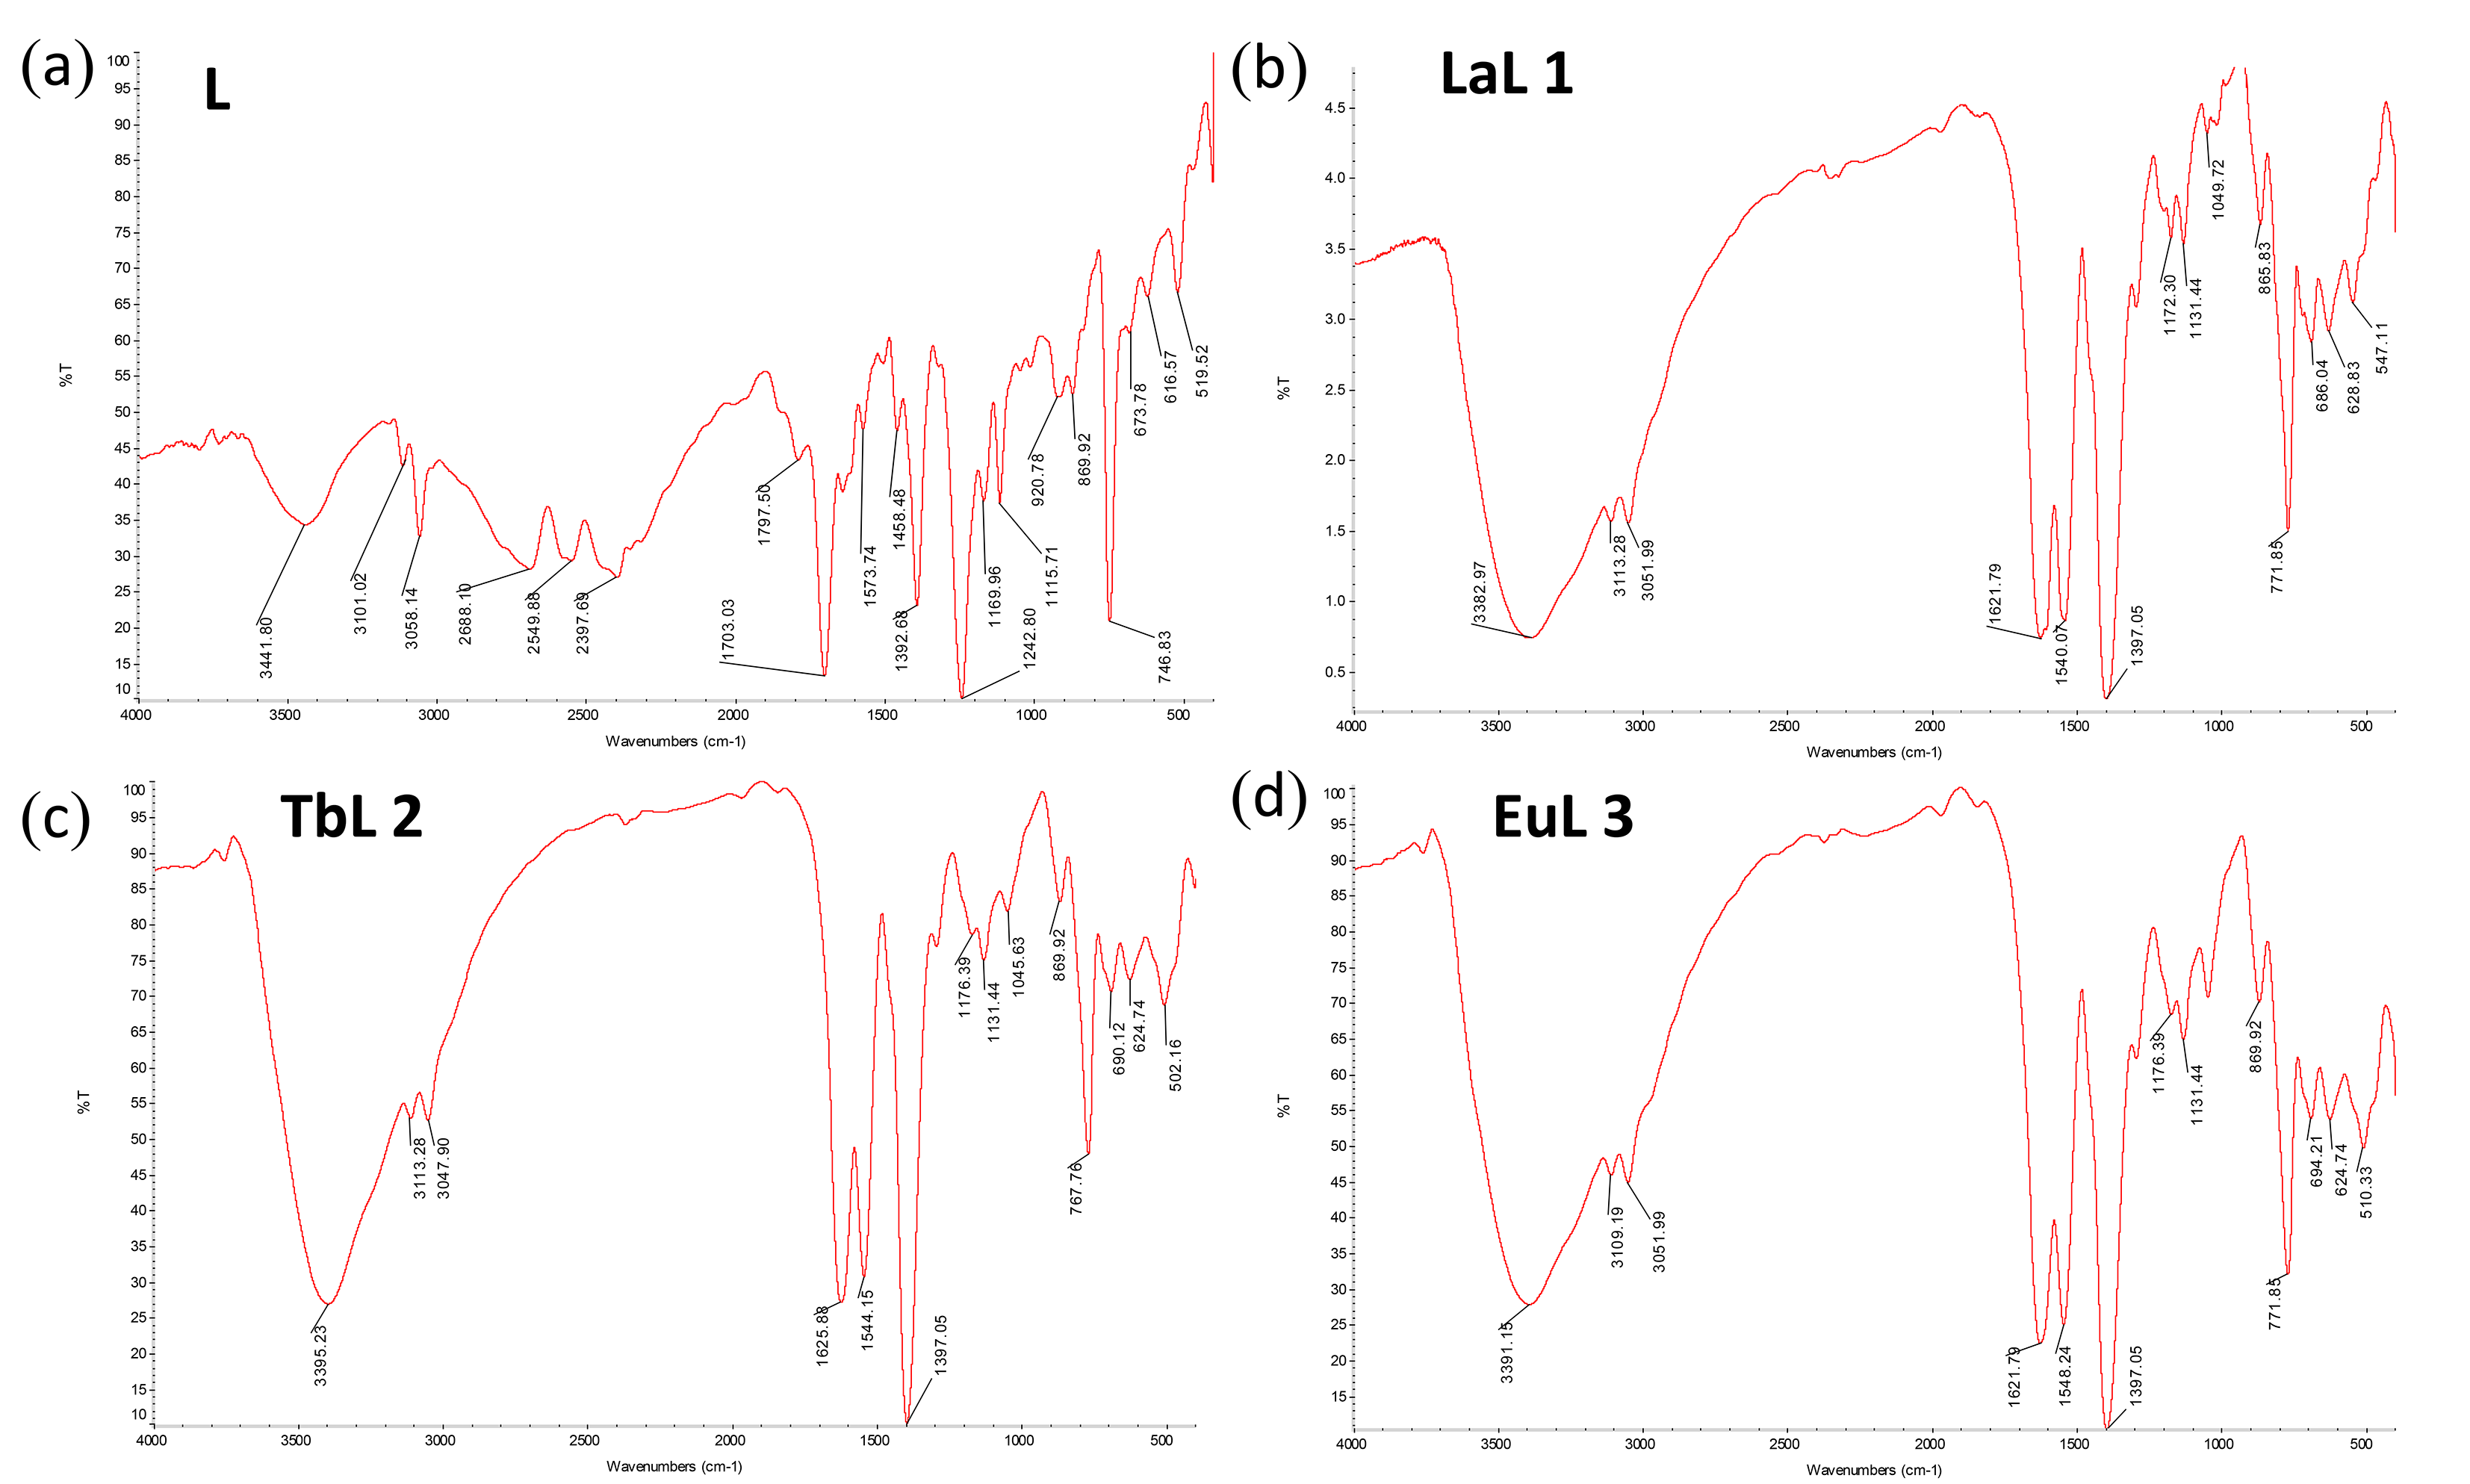


**Figure S5**. The IR spectra of (**a**) **Ligand (**H2LCl**)**; (**b**) **LaL 1**; (**c**) **TbL 2**; (**d**) **EuL 3**.


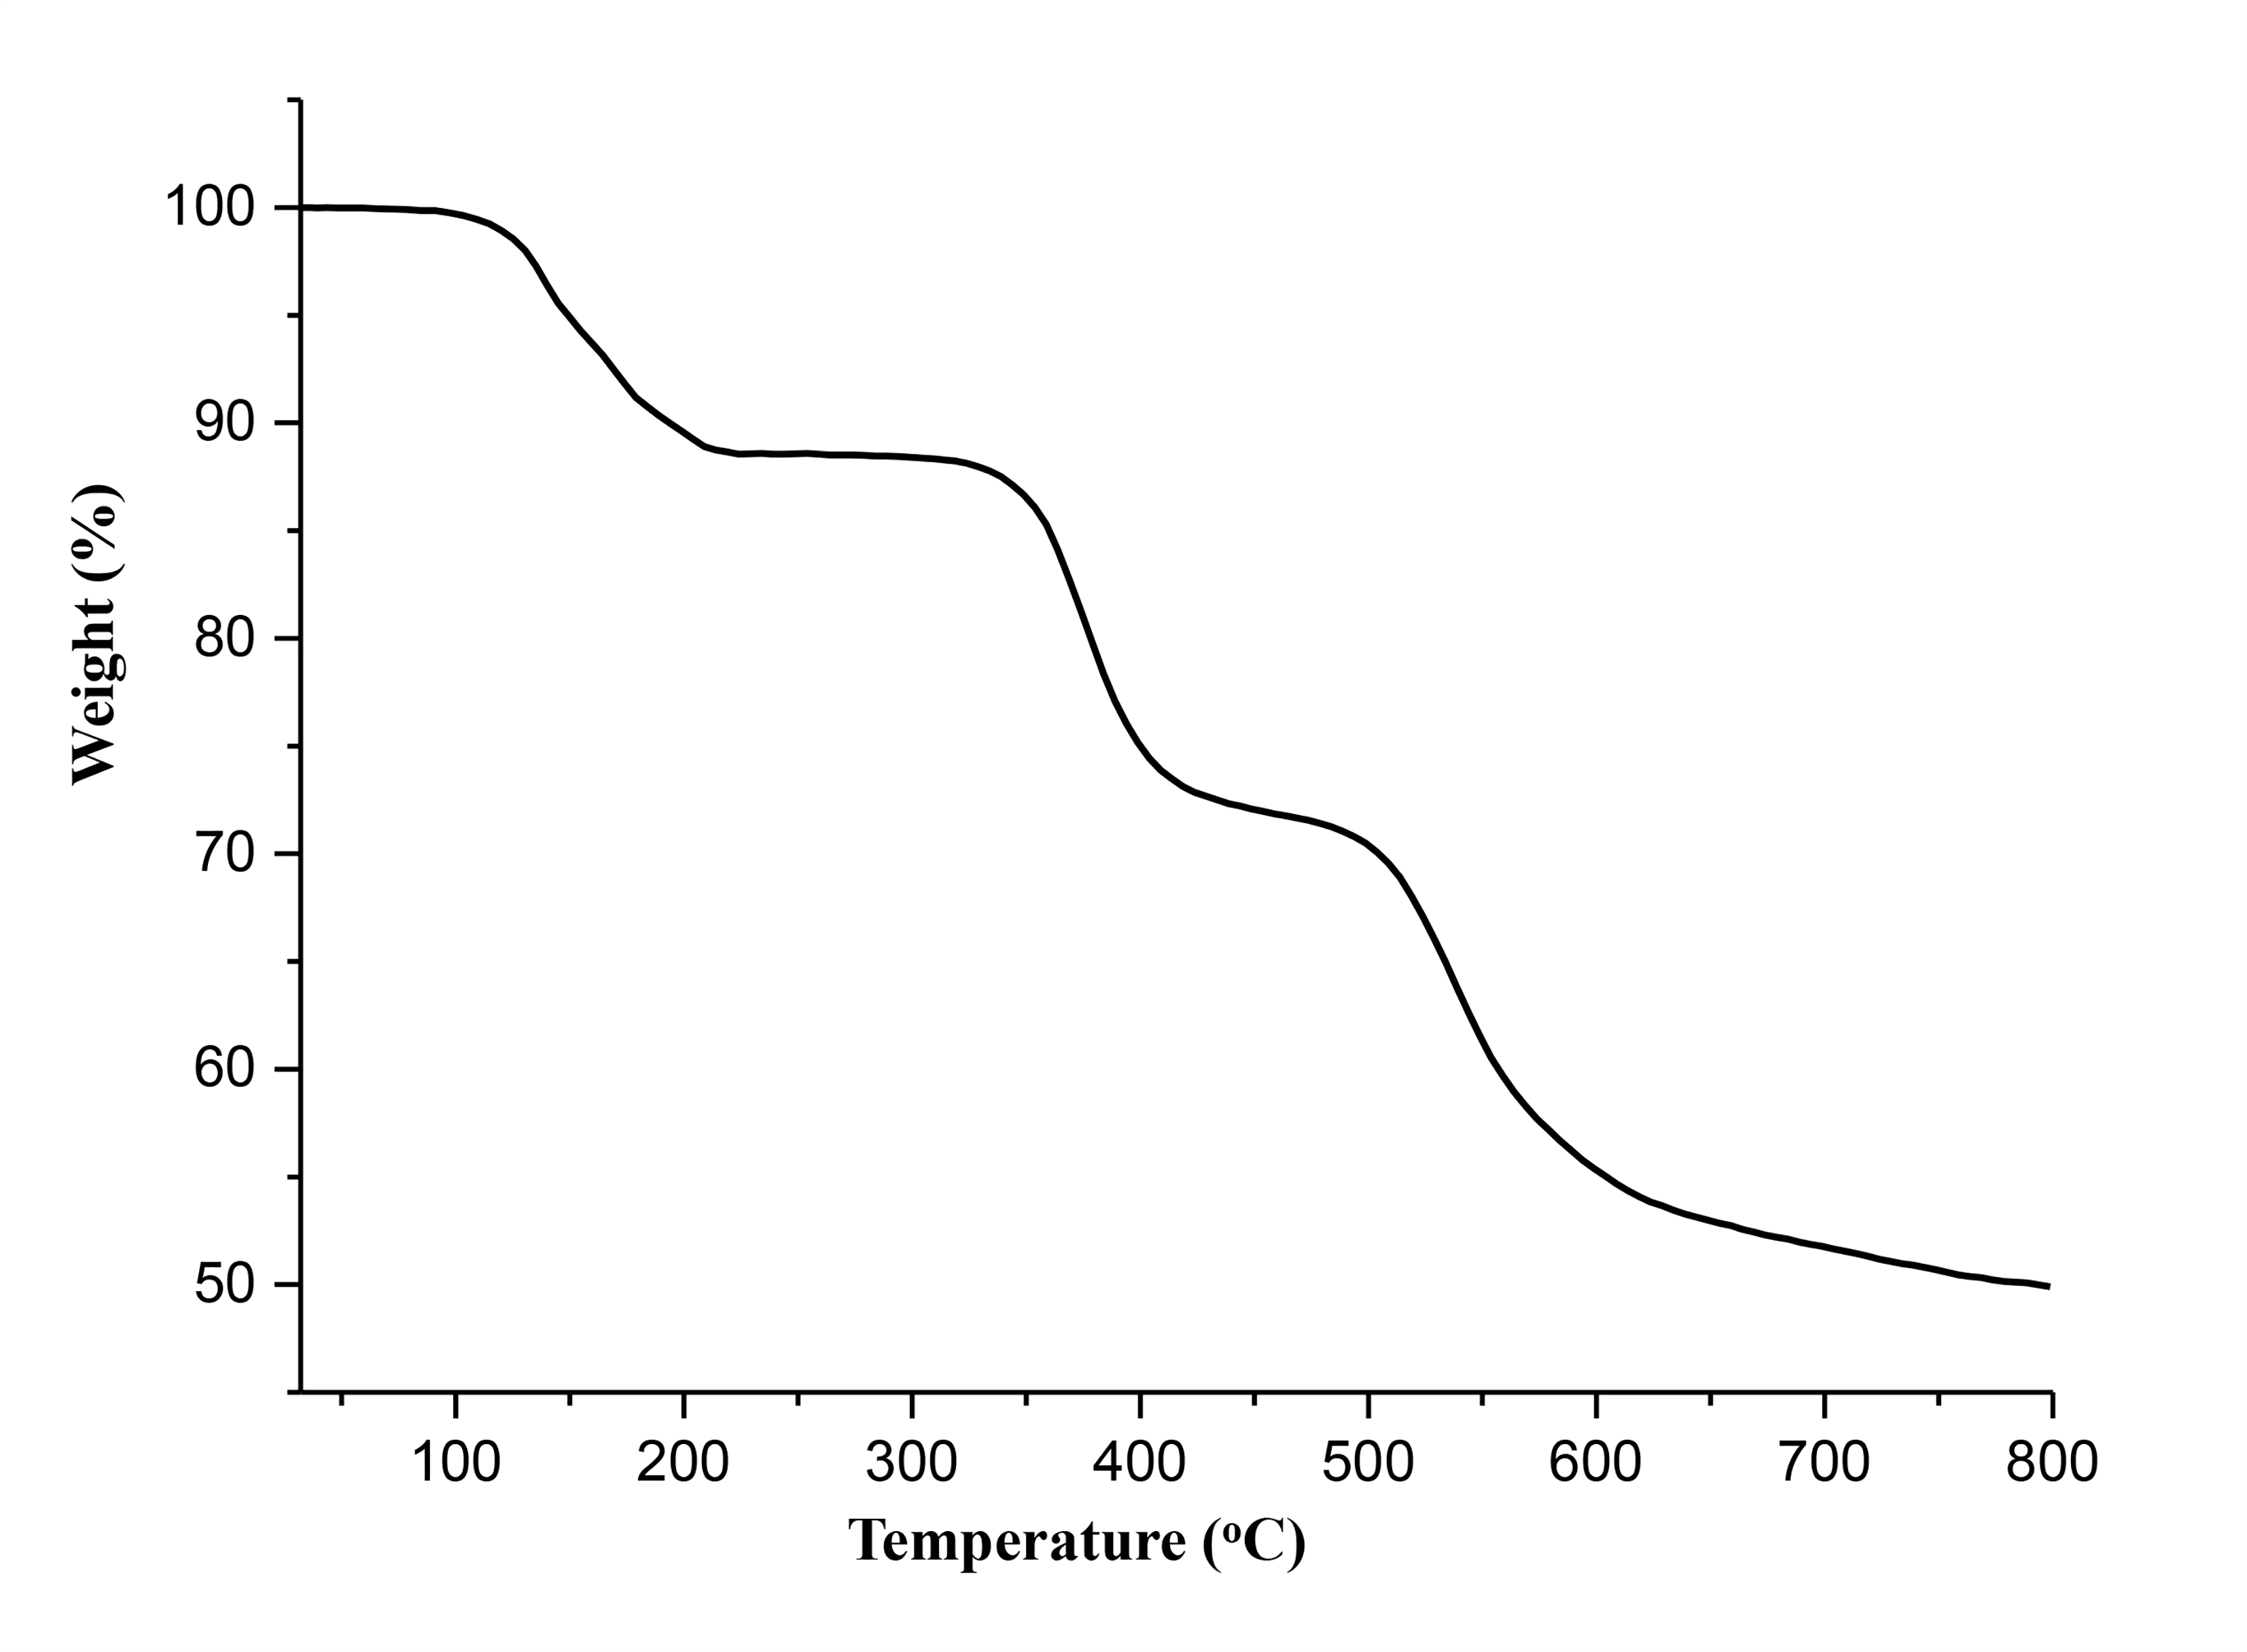


**Figure S6.** The TGA diagram of **LaL 1** as a representative.

© 2017 by the authors. Submitted for possible open access publication under the
terms and conditions of the Creative Commons Attribution (CC-BY) license (http://creativecommons.org/licenses/by/4.0/).
